# Supplementary material
Source: HighWire-hosted journal article supplement (https://gut.bmj.com/content/68/2/207)
Supplement: inline-supplementary-material-1 [file inline-supplementary-material-1.pdf]

**Suppl. Table 1:** Clinical data of patient derived organoids

| <b>Patient ID</b>    | <b>Sex</b>           | <b>Age at diagnosis</b> | <b>Diagnosis</b>                                                 | <b>TNM classification (UICC stage)</b> | <b>Organoid tissue of origin</b>        | <b>Histology (Lauren classification)</b> | <b>Neoadjuvant chemotherapy</b> | <b>Tumor regression (Becker <i>et al.</i> ,2011)</b> |
|----------------------|----------------------|-------------------------|------------------------------------------------------------------|----------------------------------------|-----------------------------------------|------------------------------------------|---------------------------------|------------------------------------------------------|
| <b><i>DD107*</i></b> | <b><i>Male</i></b>   | <b><i>49</i></b>        | <b><i>Stomach corpus carcinoma</i></b>                           | <b><i>pT3, pN2, pM0 (IIa)</i></b>      | <b><i>Stomach corpus</i></b>            | <b><i>intestinal</i></b>                 | <b><i>ECF</i></b>               | <b><i>3</i></b>                                      |
| <b><i>DD109*</i></b> | <b><i>Male</i></b>   | <b><i>56</i></b>        | <b><i>Adenocarcinoma of esophagogastric junction (AEGI)</i></b>  | <b><i>pT2, pN1, pM1 (IV)</i></b>       | <b><i>Lung metastasis</i></b>           | <b><i>diffuse</i></b>                    | <b><i>-</i></b>                 | <b><i>-</i></b>                                      |
| DD143                | Female               | 61                      | Adenocarcinoma of esophagogastric junction (AEGII)               | pT3, pN1, pM0 (IIb)                    | Esophago-gastric junction               | intestinal                               | FLOT                            | 3                                                    |
| DD155                | Male                 | 56                      | Adenocarcinoma of esophagogastric junction (AEGI)                | pT2, pN1, pM1 (IV)                     | Esophago-gastric junction               | diffuse                                  | -                               | -                                                    |
| DD156                | Female               | 80                      | Stomach corpus carcinoma                                         | pT3, pN0, pM0 (IIa)                    | Stomach corpus                          | mixed-type                               | -                               | -                                                    |
| <b><i>DD191*</i></b> | <b><i>Female</i></b> | <b><i>66</i></b>        | <b><i>Adenocarcinoma of esophagogastric junction (AEGII)</i></b> | <b><i>pT3, pN1, pM0 (IIb)</i></b>      | <b><i>Esophago-gastric junction</i></b> | <b><i>intestinal</i></b>                 | <b><i>FLOT</i></b>              | <b><i>3</i></b>                                      |
| DD194                | Female               | 46                      | Stomach corpus carcinoma                                         | pT4a, pN3, pM1 (IV)                    | Stomach corpus                          | diffuse                                  | FLOT                            | ns                                                   |

|       |        |    |                                                    |                      |                           |            |                        |   |
|-------|--------|----|----------------------------------------------------|----------------------|---------------------------|------------|------------------------|---|
| DD209 | Female | 60 | Adenocarcinoma of esophagogastric junction (AEGII) | pT3, pN1, pM0 (IIb)  | Esophago-gastric junction | diffuse    | FLOT                   | 3 |
| DD211 | Male   | 66 | Stomach antrum carcinoma                           | pT3, pN1, pM0 (IIb)  | Stomach antrum            | intestinal | ECF                    | 3 |
| DD218 | Female | 50 | Adenocarcinoma of esophagogastric junction (AEGII) | pT3, pN3, M0 (IIIb)  | Esophago-gastric junction | intestinal | -                      | - |
| DD241 | Male   | 78 | Adenocarcinoma of esophagogastric junction (AEGI)  | pT3, pN0, pM0 (IIa)  | Esophago-gastric junction | mixed-type | ECF                    | 1 |
| DD256 | Male   | 88 | Adenocarcinoma of esophagogastric junction (AEGII) | pT3, pN1, pM0 (IIa)  | Esophago-gastric junction | intestinal | -                      | - |
| DD257 | Female | 80 | Stomach carcinoma                                  | pT3, pN1, pM0 (IIb)  | Stomach                   | mixed-type | -                      | - |
| DD260 | Male   | 64 | Stomach carcinoma                                  | pT3, pN1, pM1 (IV)   | Stomach                   | diffuse    | Cisplatin/Capecitabine | 2 |
| DD261 | Male   | 60 | Stomach antrum carcinoma                           | pT3, pN3, pM1 (IV)   | Stomach antrum            | diffuse    | FLOT                   | 2 |
| DD265 | Male   | 78 | Adenocarcinoma of esophagogastric junction (AEGII) | pT3, pN2, pM0 (IIIa) | Esophago-gastric junction | diffuse    | -                      | - |

|               |               |           |                                                     |                            |                           |                   |         |   |
|---------------|---------------|-----------|-----------------------------------------------------|----------------------------|---------------------------|-------------------|---------|---|
| DD271         | Male          | 81        | Adenocarcinoma of esophagogastric junction (AEGIII) | pT3, pN1, pM1 (IIb)        | Esophago-gastric junction | intestinal        | -       | - |
| <b>DD282*</b> | <b>Female</b> | <b>81</b> | <b>Stomach antrum carcinoma</b>                     | <b>pT3, pN0, pM0 (IIa)</b> | <b>Stomach antrum</b>     | <b>intestinal</b> | -       | - |
| DD316         | Female        | 58        | Adenocarcinoma of esophagogastric junction (AEGIII) | pT4b, pN1, pM0 (IIb)       | Esophago-gastric junction | intestinal        | yes, ns | 3 |
| DD323         | Female        | 78        | Adenocarcinoma of esophagogastric junction (AEGIII) | pT4a, pN1, pM0 (IIIa)      | Esophago-gastric junction | diffuse           | -       | - |

ECF: Epirubicin/ Cisplatin/ Fluoruracil

FLOT: Fluoruracil/ Leucovorin/ Oxaliplatin/ Docetaxel

ns: not specified

\* further analyzed
