# Supplementary material
Source: HighWire-hosted journal article supplement (https://gut.bmj.com/content/68/2/207)
Supplement: inline-supplementary-material-3 [file inline-supplementary-material-3.pdf]

DD107 Xenograft

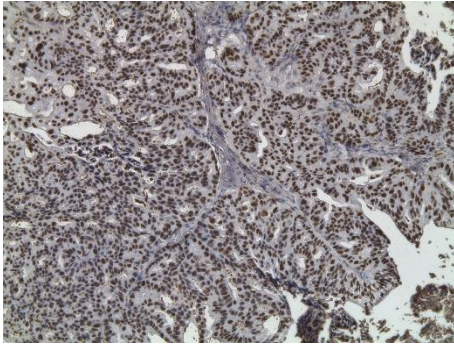

DD109 Xenograft

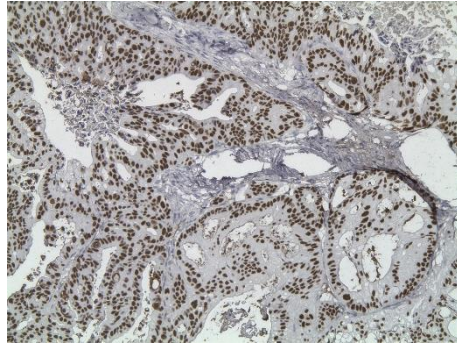

DD191 Xenograft

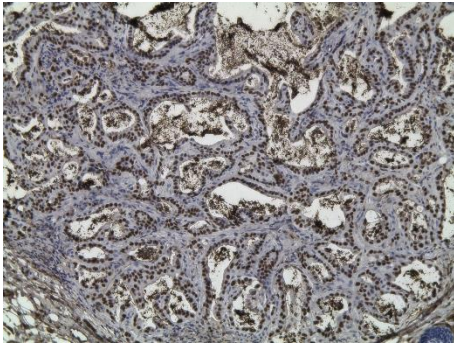

DD282 Xenograft

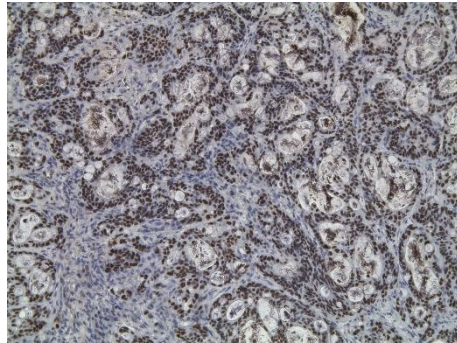

Mouse stomach (neg. control)

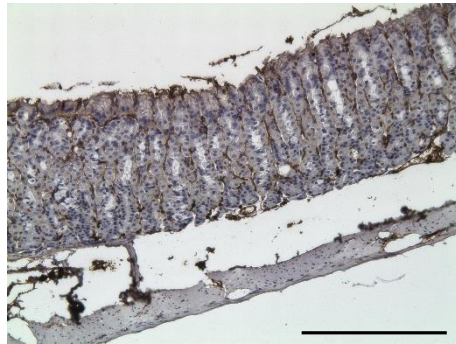

Supplementary Figure 1
