# Supplementary material
Source: HighWire-hosted journal article supplement (https://gut.bmj.com/content/68/2/207)
Supplement: inline-supplementary-material-4 [file inline-supplementary-material-4.pdf]

**A****5-FU**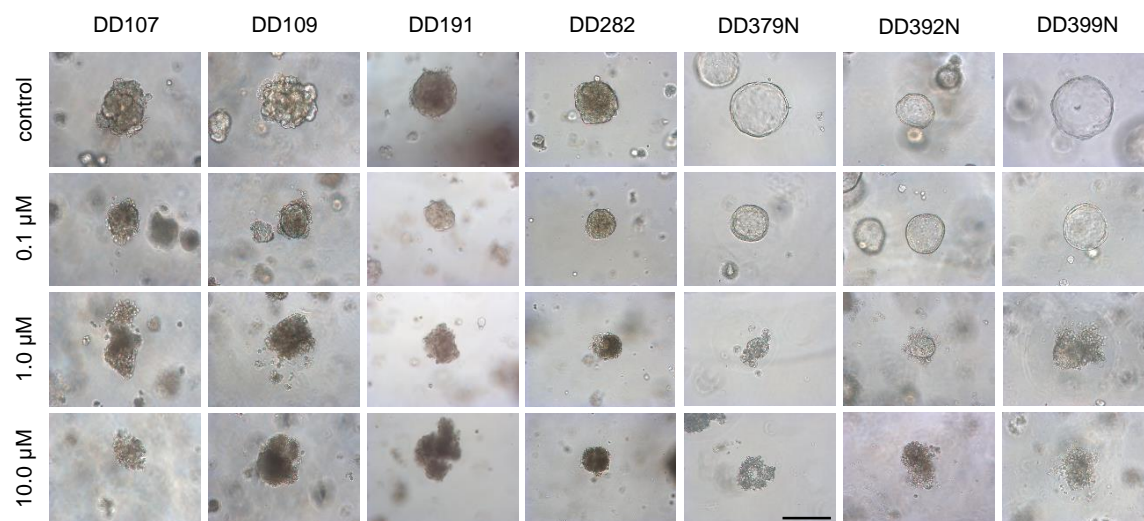**B****Oxaliplatin**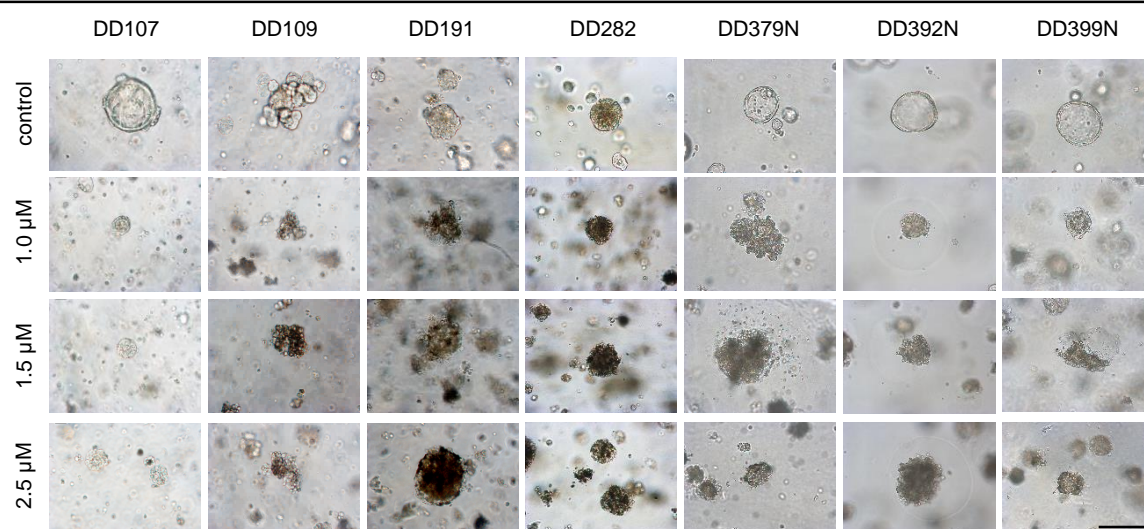**C****Irinotecan**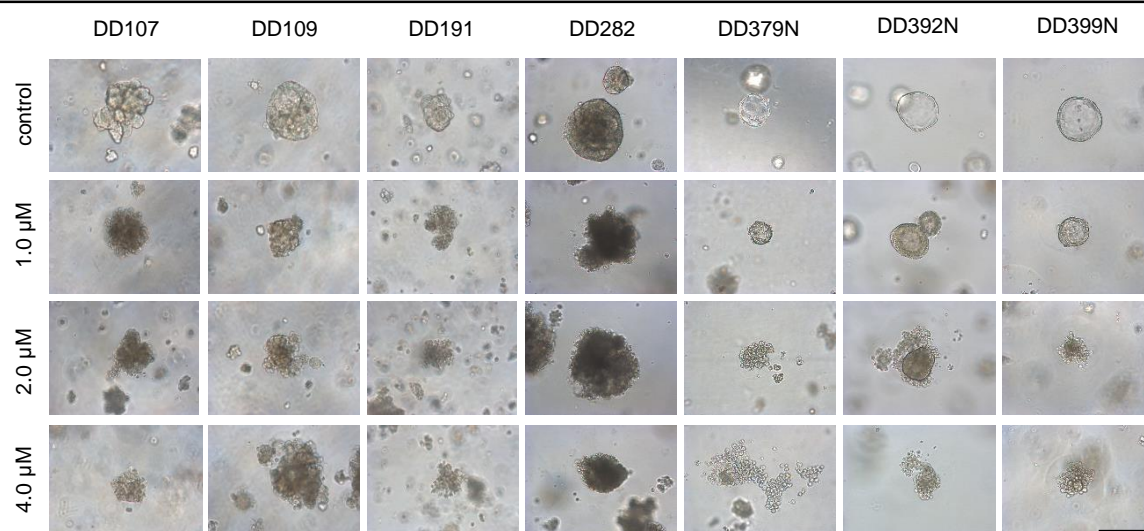

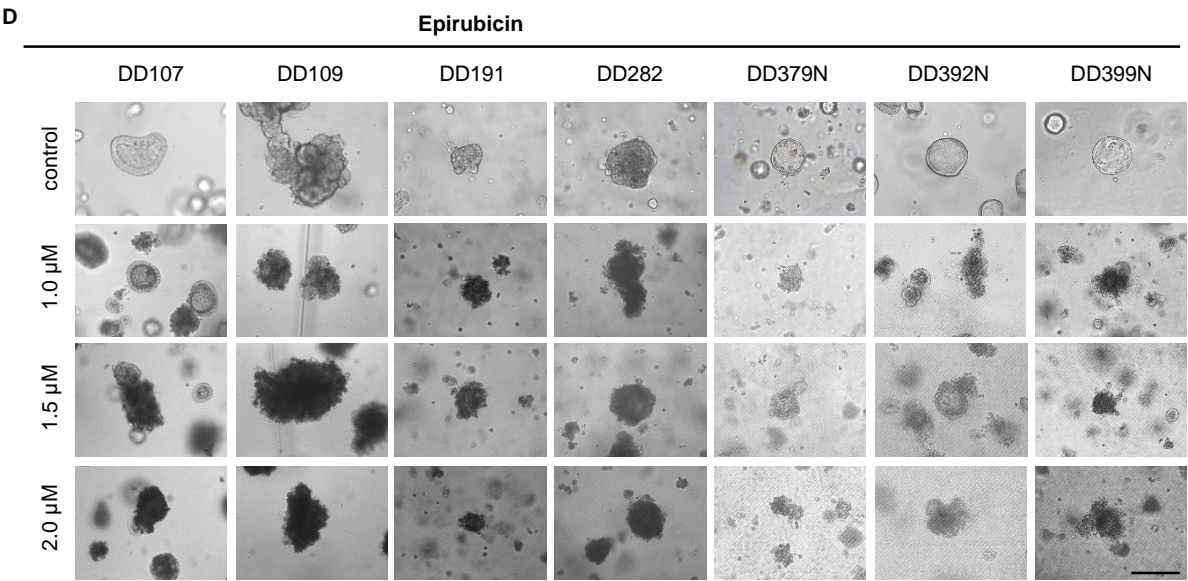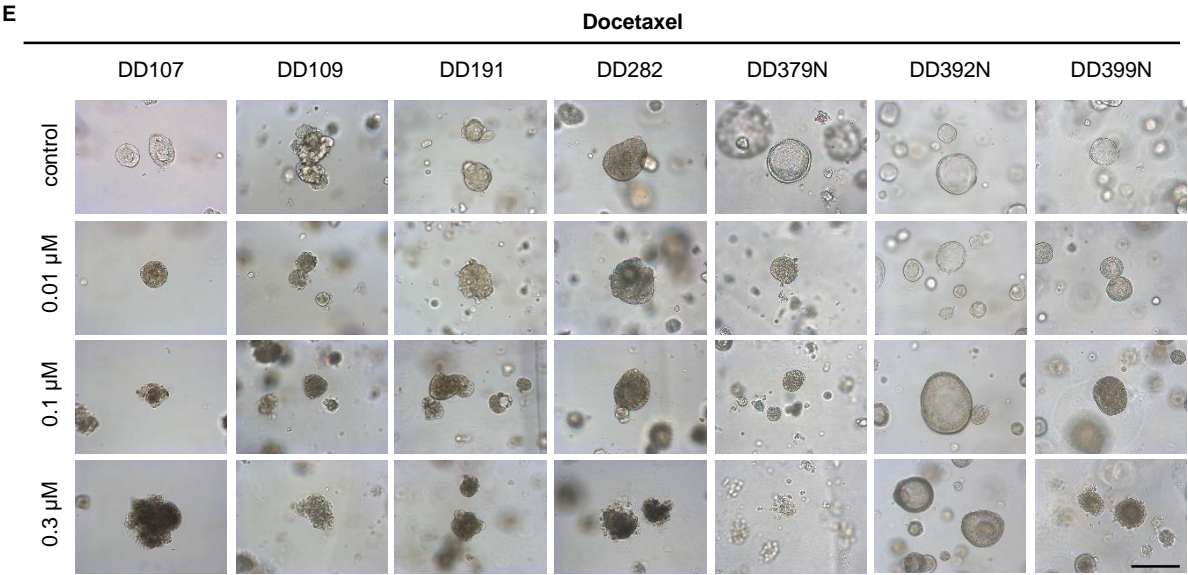

Supplementary Figure 3
