# Supplementary material
Source: HighWire-hosted journal article supplement (https://gut.bmj.com/content/68/2/207)
Supplement: inline-supplementary-material-6 [file inline-supplementary-material-6.pdf]

**Suppl. Table 2:** IC50 values of gastric cancer cell lines, gastric cancer organoids and normal gastric organoids after chemotherapy

| Chemotherapeutics<br>( $\mu\text{M}$ ) | Gastric cancer cell lines |          |      |      | Gastric cancer organoids |       |       |       | Gastric normal organoids |        |        |
|----------------------------------------|---------------------------|----------|------|------|--------------------------|-------|-------|-------|--------------------------|--------|--------|
|                                        | AGS                       | KatolIII | Snu1 | Snu5 | DD107                    | DD109 | DD191 | DD282 | DD379N                   | DD392N | DD399N |
| 5-FU                                   | 0.73                      | 3.53     | 0.11 | 0.50 | 0.19                     | 2.90  | 0.02  | 0.06  | 2.71                     | 1.01   | -*     |
| Oxaliplatin                            | 0.03                      | 0.12     | 0.04 | 0.11 | 1.54                     | 1.51  | 2.04  | -*    | 1.07                     | -*     | 1.78   |
| Irinotecan                             | 0.23                      | 0.51     | 0.04 | 0.51 | 2.03                     | 1.95  | 1.05  | 6.22  | 1.95                     | 1.05   | 6.22   |
| Epirubicin                             | 0.30                      | 2.72     | 0.18 | -*   | 2.93                     | 1.53  | 0.11  | 0.43  | 1.13                     | -*     | 0.87   |
| Docetaxel                              | 0.06                      | 0.22     | 0.01 | 0.06 | -*                       | 0.12  | 0.12  | -*    | -*                       | 0.52   | 0.20   |

\*no IC50 calculation possible by GraphPad due to irregular curve shape or no response (see Figure 3; Suppl. Figure 2; Suppl. Figure 4)
