# Supplementary material
Source: HighWire-hosted journal article supplement (https://gut.bmj.com/content/68/2/207)
Supplement: inline-supplementary-material-8 [file inline-supplementary-material-8.pdf]

A

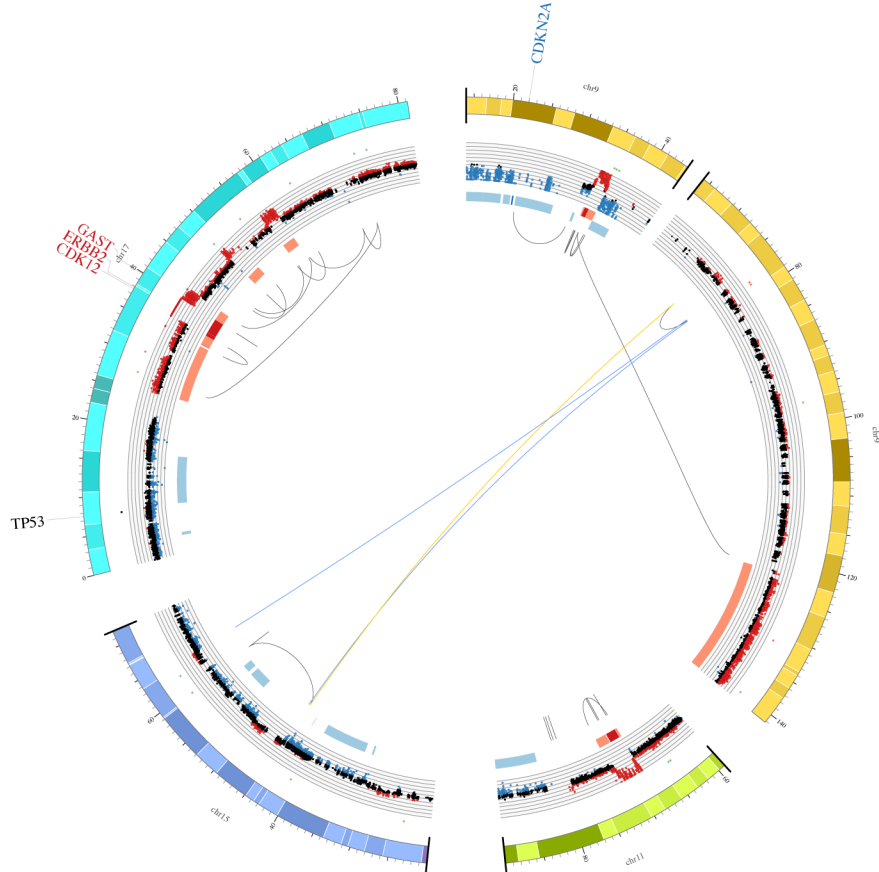

B

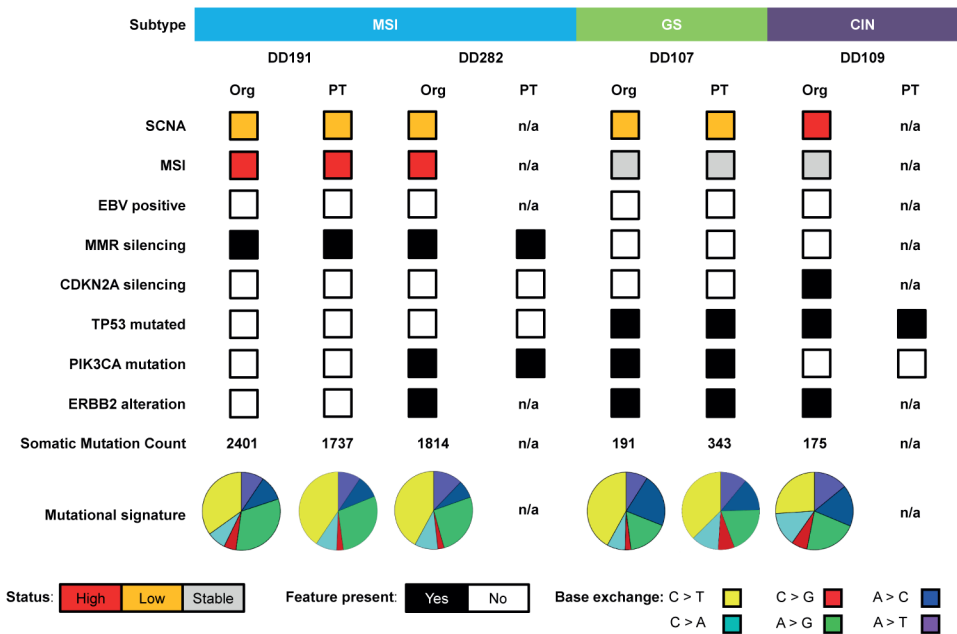

C

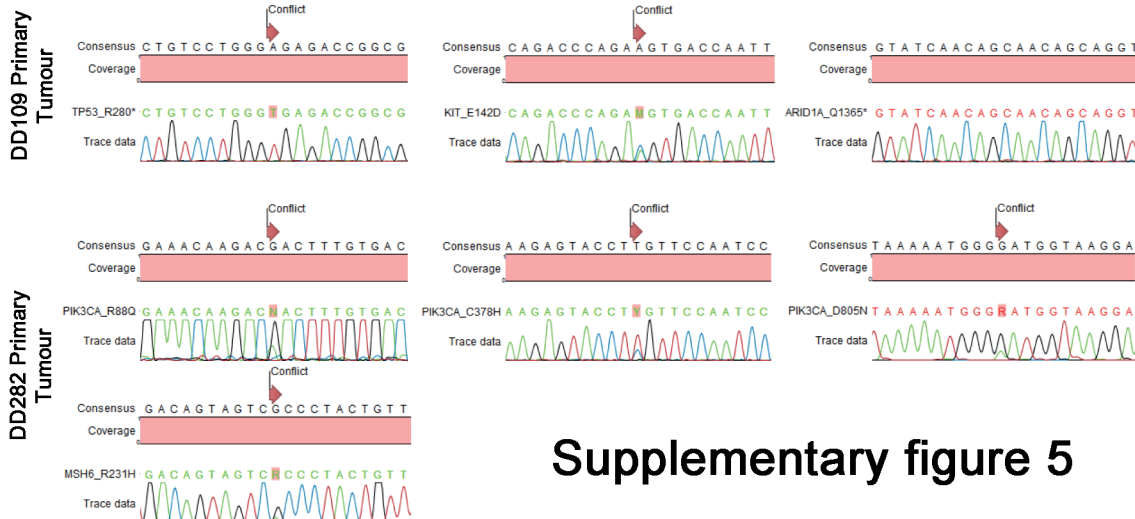

Supplementary figure 5
