# Supplementary material
Source: HighWire-hosted journal article supplement (https://gut.bmj.com/content/68/2/207)
Supplement: inline-supplementary-material-9 [file inline-supplementary-material-9.pdf]

A

DD107

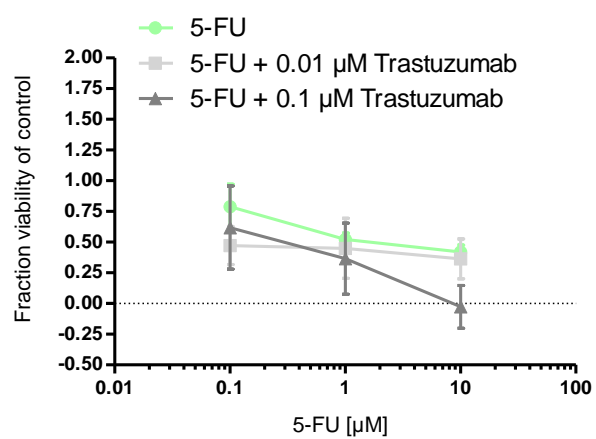

B

DD109

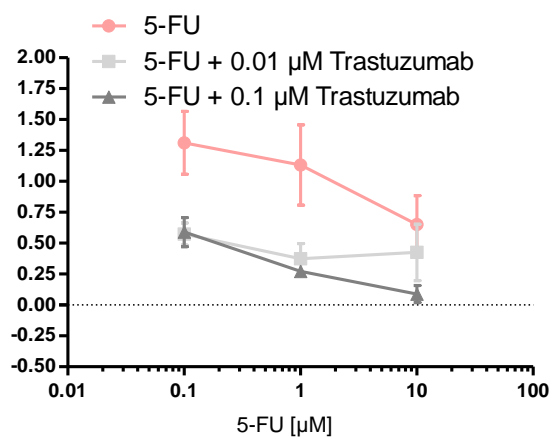

Supplementary Figure 6
