# Supplementary material
Source: HighWire-hosted journal article supplement (https://gut.bmj.com/content/68/2/207)
Supplement: inline-supplementary-material-10 [file inline-supplementary-material-10.pdf]

**Suppl. Table 4:** Targeted mutations of DD107 and DD109

| Patient ID | Mutation          |      |               |                      |                   |                   |              |                                           | Targeting           |                          |
|------------|-------------------|------|---------------|----------------------|-------------------|-------------------|--------------|-------------------------------------------|---------------------|--------------------------|
|            | Gene (H. sapiens) | Type | Location      | Frequency / Zygosity | Nucleotide change | Amino acid change | Fold change  | Pathway                                   | Type                | Name                     |
| DD107      | ERBB2             | SNV  | Chromosome 17 | 100 % / Homozygous   | C929T             | S310F             | -            | Activating Her2 growth receptor signaling | Monoclonal antibody | Trastuzumab              |
| DD109      | ERBB2             | CNV  | Chromosome 17 | -                    | -                 |                   | +93 x (Gain) | Increasing number of Her2 receptors       | Monoclonal antibody | Trastuzumab              |
|            | CDKN2A            | CNV  | Chromosome 9  | -                    | -                 |                   | -77 x (Loss) | Loss of cell cycle suppressor             | Inhibitor           | Palbociclib (PD-0332991) |
|            | KIT               | SNV  | Chromosome 4  | 97 % / Homozygous    | A426C             | E142D             | -            | Unknown effect of c-Kit signaling         | Inhibitor           | Imatinib                 |
